# Supplementary material for: Kosmetische und funktionelle Ergebnisse nach Resektion kutaner Neurofibrome bei Neurofibromatose I
Source: Springer Nature journal article supplement (doi:10.1007/s00105-023-05220-8), 2023-09-20
Supplement: MOESM1 [file 26065032]

**Supplementary Information:** Modifizierter DLQI, Anzahl der durchgeführten Operationen mit Art des Eingriffs und Anzahl operierter Stellen insgesamt pro Patient und Modifizierter DLQI mit Darstellung der Ergebnisse prozentual anteilig an der Gesamtzahl aller Patienten

### Anhang 1.1 Modifizierter DLQI

Haben Sie sich vor der Operation in unserer Klinik durch die Neurofibromatose Typ I in Ihrem Alltag eingeschränkt gefühlt?

- Ja
  - Sehr stark
  - Stark
  - Gering
- Nein

Fühlen Sie sich derzeit durch die Neurofibromatose Typ I in Ihrem Alltag eingeschränkt?

- Ja
  - Sehr stark
  - Stark
  - Gering
- Nein

Hatten Sie zu irgendeinem Zeitpunkt vor der Operation in unserer Klinik Probleme in Ihrer Berufsausübung aufgrund der Neurofibromatose Typ I?

- Ja
  - Sehr starke Probleme
  - Starke Probleme
  - Geringe Probleme
- Nein
- Keine Antwort möglich, da nicht berufstätig.

Haben Sie derzeit Probleme in Ihrer Berufsausübung aufgrund der Neurofibromatose Typ I?

- Ja
  - Sehr starke Probleme
  - Starke Probleme
  - Geringe Probleme
- Nein
- Keine Antwort möglich, da nicht berufstätig.

Haben Sie sich vor der Operation in unserer Klinik durch die Neurofibromatose befangen oder verlegen gefühlt?

- Ja
  - Sehr stark
  - Stark
  - Gering
- Nein

Fühlen Sie sich derzeit durch die Neurofibromatose befangen oder verlegen?

- Ja
  - Sehr stark
  - Stark
  - Gering
- Nein

Bestand vor der Operation in unserer Klinik eine Beeinträchtigung bei Einkaufen und Hausarbeit durch die Neurofibromatose?

Ja

Sehr stark

Stark

Gering

Nein

Besteht derzeit eine Beeinträchtigung bei Einkaufen und Hausarbeit durch die Neurofibromatose?

Ja

Sehr stark

Stark

Gering

Nein

Bestand vor der Operation in unserer Klinik eine Beeinträchtigung Ihrer Kleiderwahl durch die Neurofibromatose?

Ja

Sehr stark

Stark

Gering

Nein

Besteht derzeit eine Beeinträchtigung Ihrer Kleiderwahl durch die Neurofibromatose?

Ja

Sehr stark

Stark

Gering

Nein

Bestand vor der Operation in unserer Klinik eine Beeinträchtigung Ihrer Freizeitgestaltung durch die Neurofibromatose?

Ja

Sehr stark

Stark

Gering

Nein

Besteht derzeit eine Beeinträchtigung Ihrer Freizeitgestaltung durch die Neurofibromatose?

Ja

Sehr stark

Stark

Gering

Nein

Bestand vor der Operation in unserer Klinik eine Beeinträchtigung bei Freundschaft, in Familie oder Partnerschaft durch die Neurofibromatose?

Ja

Sehr stark

Stark

Gering

Nein

Besteht derzeit eine Beeinträchtigung bei Freundschaft, in Familie oder Partnerschaft durch die Neurofibromatose?

Ja

Sehr stark

Stark

Gering

Nein

Bestand vor der Operation in unserer Klinik eine Beeinträchtigung Ihres Liebeslebens durch die Neurofibromatose?

Ja

Sehr stark

Stark

Gering

Nein

Besteht derzeit eine Beeinträchtigung Ihres Liebeslebens durch die Neurofibromatose?

Ja

Sehr stark

Stark

Gering

Nein

## 1.2. Fragebogen

Wieviel Jahre vor der Operation in unserer Klinik traten erstmals *kutane Neurofibrome bei der Neurofibromatose Typ I* auf?

0 bis 6 Monate

6 Monate bis 1 Jahr

1 Jahr bis 2 Jahre

2 Jahre bis 5 Jahre

mehr als 5 Jahre

Wieviel Monate vor der Operation in unserer Klinik stellten Sie sich wegen der Neurofibromatose Typ I zum ersten Mal bei einem Arzt vor?

0 bis 6 Monate

6 Monate bis 1 Jahr

1 Jahr bis 2 Jahre

2 Jahre bis 5 Jahre

mehr als 5 Jahre

An welchen Körperstellen zeigten sich bei Ihnen kutane Neurofibrome der Neurofibromatose Typ I? (Mehrfachnennungen möglich)

Gesicht

Sonstige Lokalisation am Kopf

Hals

Rumpf

Arme

Beine

Andere Körperstelle: \_\_\_\_\_

## Teil II

Wie zufrieden waren Sie *insgesamt* mit der Operation?

Sehr zufrieden

Zufrieden

Ausreichend zufrieden

Unzufrieden

Sehr unzufrieden

Wie zufrieden sind Sie mit dem *kosmetischen Ergebnis* der Operation?

Sehr zufrieden

Zufrieden

Ausreichend zufrieden

Unzufrieden

Sehr unzufrieden

Hatten Sie nach der Operation Schmerzen im Operationsgebiet?

Ja

Ich benötigte deshalb Schmerzmittel

Ich benötigte deshalb keine Schmerzmittel

Nein

Traten nach der Operation Komplikationen auf?

Ja

Nachblutung

Wundinfektion

Dauerhafte funktionelle Einschränkung z.B. durch Vernarbung

Nein

Kam es seit der Operation zu einem Wiederauftreten der kutanen Neurofibrome bei Neurofibromatose Typ I in anatomischer Nähe zum Operationsgebiet?

Ja

Die Beschwerden sind *geringer* als vor der Operation

Die Beschwerden sind in etwa *gleich* wie vor der Operation

Die Beschwerden sind *stärker* als vor der Operation

Nein

Würden Sie persönlich die durchgeführte Operation bei Neurofibromatose Typ I weiterempfehlen?

Ja

Nein

Teil III

Haben Sie sich vor der Operation in unserer Klinik durch die Neurofibromatose Typ I in Ihrem Alltag eingeschränkt gefühlt?

Ja

Sehr stark



- Stark
- Gering
- Nein

Fühlen Sie sich derzeit durch die Neurofibromatose Typ I in Ihrem Alltag eingeschränkt?

- Ja
  - Sehr stark
  - Stark
  - Gering
- Nein

Hatten Sie zu irgendeinem Zeitpunkt vor der Operation in unserer Klinik Probleme in Ihrer Berufsausübung *aufgrund der* Neurofibromatose Typ I?

- Ja
- Sehr starke Probleme
  - Starke Probleme
  - Geringe Probleme
- Nein
- Keine Antwort möglich, da nicht berufstätig.

Haben Sie derzeit Probleme in Ihrer Berufsausübung *aufgrund der* Neurofibromatose Typ I?

- Ja
  - Sehr starke Probleme
  - Starke Probleme
  - Geringe Probleme
- Nein

Keine Antwort möglich, da nicht berufstätig.

Haben Sie sich vor der Operation in unserer Klinik durch die Neurofibromatose befangen oder verlegen gefühlt?

Ja

Sehr stark

Stark

Gering

Nein

Fühlen Sie sich derzeit durch die Neurofibromatose befangen oder verlegen?

Ja

Sehr stark

Stark

Gering

Nein

Bestand vor der Operation in unserer Klinik eine Beeinträchtigung bei Einkaufen und Hausarbeit durch die Neurofibromatose?

Ja

Sehr stark

Stark

Gering

Nein

Besteht derzeit eine Beeinträchtigung bei Einkaufen und Hausarbeit durch die Neurofibromatose?

Ja

Sehr stark

Stark

Gering

Nein

Bestand vor der Operation in unserer Klinik eine Beeinträchtigung Ihrer Kleiderwahl durch die Neurofibromatose?

Ja

Sehr stark

Stark

Gering

Nein

Besteht derzeit eine Beeinträchtigung Ihrer Kleiderwahl durch die Neurofibromatose?

Ja

Sehr stark

Stark

Gering

Nein

Bestand vor der Operation in unserer Klinik eine Beeinträchtigung Ihrer Freizeitgestaltung durch die Neurofibromatose?

Ja

Sehr stark

Stark

Gering

Nein

Besteht derzeit eine Beeinträchtigung Ihrer Freizeitgestaltung durch die Neurofibromatose?

Ja

Sehr stark

Stark

Gering

Nein

Bestand vor der Operation in unserer Klinik eine Beeinträchtigung Ihrer Kleiderwahl durch die Neurofibromatose?

Ja

Sehr stark

Stark

Gering

Nein

Besteht derzeit eine Beeinträchtigung Ihrer Kleiderwahl durch die Neurofibromatose?

Ja

Sehr stark

Stark

Gering

Nein

Bestand vor der Operation in unserer Klinik eine Beeinträchtigung bei Freundschaft, in Familie oder Partnerschaft durch die Neurofibromatose?

Ja

Sehr stark

Stark

Gering

Nein

Besteht derzeit eine Beeinträchtigung bei Freundschaft, in Familie oder Partnerschaft durch die Neurofibromatose?

Ja

Sehr stark

Stark

Gering

Nein

Bestand vor der Operation in unserer Klinik eine Beeinträchtigung Ihres Liebeslebens durch die Neurofibromatose?

Ja

Sehr stark

Stark

Gering

Nein

Besteht derzeit eine Beeinträchtigung Ihres Liebeslebens durch die Neurofibromatose?

Ja

Sehr stark

Stark

Gering

Nein

**Anhang 2. Anzahl der durchgeführten Operationen mit Art des Eingriffs und Anzahl operierter Stellen insgesamt pro Patient**

| Anzahl OP-<br>termine | Exzisionen | Biopsien<br>(Punch) | Shave/Kurettage/Laser<br>/Scherenschlag | Stellen gesamt |
|-----------------------|------------|---------------------|-----------------------------------------|----------------|
| 2                     | 8          | 8                   | 0                                       | 16             |
| 1                     | 3          | 0                   | 0                                       | 3              |
| 3                     | 3          | 0                   | 2                                       | 5              |
| 1                     | 9          | 0                   | 0                                       | 9              |
| 1                     | 1          | 0                   | 0                                       | 1              |
| 1                     | 4          | 0                   | 0                                       | 4              |
| 1                     | 5          | 0                   | 0                                       | 5              |
| 3                     | 6          | 0                   | 1                                       | 7              |
| 1                     | 0          | 4                   | 0                                       | 4              |
| 17                    | 67         | 82                  | 40                                      | 189            |
| 5                     | 7          | Anzahl n. bekannt   | 225+                                    | 262+           |
| 2                     | 4          | 0                   | 7                                       | 11             |
| 3                     | 3          | 0                   | 0                                       | 3              |
| 1                     | 1          | 0                   | 0                                       | 1              |
| 1                     | 1          | 0                   | 0                                       | 1              |
| 5                     | 22         | 0                   | 1                                       | 23             |
| 3                     | 1          | 21                  | 25                                      | 47             |
| 1                     | 1          | 0                   | 0                                       | 1              |
| 11                    | 3          | 91                  | 91                                      | 183            |
| 11                    | 5          | 0                   | 190                                     | 195            |
| 4                     | 9          | 2                   | 10                                      | 21             |
| 20                    | 10         | 127                 | 164                                     | 470            |
| 1                     | 2          | 0                   | 0                                       | 2              |
| 4                     | 4          | 0                   | 100                                     | 104            |
| 7                     | 20         | 4                   | 5                                       | 26             |
| 2                     | 2          | 0                   | 4                                       | 6              |
| 3                     | 2          | 0                   | 62                                      | 164            |
| 1                     | 2          | 0                   | 1                                       | 3              |
| 4                     | 5          | 0                   | 0                                       | 5              |
| 5                     | 13         | 0                   | Anzahl n. bekannt                       | 14+            |
| <b>Gesamt</b>         |            |                     |                                         |                |
| 125                   | 223        | 339+                | 703+                                    | 1509+          |

### Anhang 3. Modifizierter DLQI mit Darstellung der Ergebnisse prozentual anteilig an der Gesamtzahl aller Patienten

|                                                       | Sehr stark | Stark   | Gering  | Überhaupt nicht |
|-------------------------------------------------------|------------|---------|---------|-----------------|
| Einschränkung im Alltag vor der OP                    | 16,67 %    | 30 %    | 16,67 % | 36,67 %         |
| Einschränkung im Alltag nach der OP                   | 3,33 %     | 26,67 % | 23,33 % | 46,67 %         |
|                                                       | Sehr stark | Stark   | gering  | Überhaupt nicht |
| Einschränkung im Berufsleben vor der OP               | 3,33 %     | 10 %    | 0 %     | 70 %            |
| Einschränkung im Berufsleben nach der OP              | 3,33 %     | 3,33 %  | 0 %     | 76,67 %         |
|                                                       | Sehr stark | Stark   | gering  | Überhaupt nicht |
| Befangenheit durch Neurofibrome vor der OP            | 13,33 %    | 36,67 % | 20 %    | 30 %            |
| Befangenheit durch Neurofibrome nach der OP           | 6,67 %     | 13,33 % | 40 %    | 40 %            |
|                                                       | Sehr stark | Stark   | Gering  | Überhaupt nicht |
| Einschränkung im Haushalt/ beim Einkaufen vor der OP  | 3,33 %     | 3,33 %  | 0%      | 90%             |
| Einschränkung im Haushalt/ beim Einkaufen nach der OP | 3,33 %     | 3,33 %  | 0%      | 90%             |
|                                                       | Sehr stark | Stark   | Gering  | Überhaupt nicht |
| Beeinträchtigung der Kleiderwahl vor der OP           | 6,67 %     | 40 %    | 6,67 %  | 46,67 %         |
| Beeinträchtigung der Kleiderwahl nach der OP          | 3,33 %     | 30 %    | 13,33 % | 53,33 %         |



|                                                     | Sehr stark | stark   | Gering  | Überhaupt nicht |
|-----------------------------------------------------|------------|---------|---------|-----------------|
| Beeinträchtigung der Freizeitgestaltung vor der OP  | 13,33 %    | 16,67 % | 13,33 % | 56,67 %         |
| Beeinträchtigung der Freizeitgestaltung nach der OP | 10 %       | 6,67 %  | 16,67 % | 66,67 %         |
|                                                     | Sehr stark | Stark   | Gering  | Überhaupt nicht |
| Beeinträchtigung im sozialen Umfeld vor der OP      | 3,33 %     | 6,67 %  | 10 %    | 80 %            |
| Beeinträchtigung im sozialen Umfeld nach der OP     | 0 %        | 3,33 %  | 10 %    | 86,67 %         |
|                                                     | Sehr stark | Stark   | Gering  | Überhaupt nicht |
| Beeinträchtigung im Liebesleben vor der OP          | 3,33 %     | 3,33%   | 6,67%   | 76,67%          |
| Beeinträchtigung im Liebesleben nach der OP         | 0 %        | 3,33 %  | 6,67%   | 80%             |
